# Supplementary material for: Hydrophilic carbon quantum dots assisting porous P(VDF–HFP) film for self-powered humidity sensing with high sensitivity and low hysteresis
Source: Royal Society of Chemistry journal article supplement (doi:10.1039/d4tc03687e), 2024-01-01
Supplement: d4tc03687e1.pdf [file d4tc03687e1.pdf]

## Supporting Information

### **Hydrophilic Carbon Quantum Dots Assisting Porous P(VDF-HFP) film for Self-powered Humidity Sensing with High Sensitivity and Low Hysteresis**

Ping Huang<sup>1</sup>, Shunjian Xu<sup>2,\*</sup>, Lei Liu<sup>3</sup>, Kai Fu<sup>4</sup>, Haiyan Fu<sup>1</sup>, Kaixin Shao<sup>1</sup>, Qi Huang<sup>1</sup>,  
Zonghu Xiao<sup>1</sup>, Jianhua Huang<sup>1,5</sup>, Hong Jin<sup>1</sup>

<sup>1</sup>Xinyu Institute of New Energy, Xinyu University, Xinyu 338004, China

<sup>2</sup>School of Intelligent Manufacturing, Huzhou College, Huzhou 313000, China

<sup>3</sup>School of Mechanical and Electrical Engineering, Xinyu University, Xinyu 338004, China

<sup>4</sup>School of Information Engineering, Xinyu University, Xinyu 338004, China

<sup>5</sup>Hunan Engineering Laboratory for Control and Optimization of PV Systems, Hunan Vocational Institute of Technology, Xiangtan 411104, China

\*Corresponding author: xushunjian@126.com

## **1. Experimental section**

### **1.1 Synthesis of carbon dots**

Citric acid (3.6 g), urea (1.5 g) and solvent (25 mL, H<sub>2</sub>O or DMF) were heated at 200 °C for 12 h, and then cooled down to room temperature. The reacted solution was processed by centrifugation at 10000 rpm for 30 min, suction filtration with 0.22 μm membranes and dialysis with 1000 Da hydrolysis membrane for 24 h. The purified CDs solution was then freeze-dried into dark powder for late use.

### **1.2 Preparation of piezoelectric films**

3 mg CDs was added into DMF (2 mL), and then stirred magnetically for 2 h to get CDs/DMF dispersion. PVDF-HFP (0.6 g), acetone (3 mL) and the CDs/DMF dispersion were stirred magnetically for 4 h to obtain PVDF-HFP/CDs solution. The solution was then spin-coated on the ITO-PEN electrode (20 mm × 20 mm) at the rotating speed of 800 rpm for 60 s. After the solvent evaporated, the obtained P-Z-C film was annealed at the temperature of 120 °C for 1 h.

### **1.3 Assembly of flexible piezoelectric devices**

The piezoelectric device was composed of a sandwich structure of the piezoelectric film attached to the bottom ITO-PEN electrode and a top porous copper foil. The top copper foil (20 mm × 15 mm) was physically attached on the piezoelectric film to form an effective area of 15 mm × 15 mm. The part of the piezoelectric film not covered by the top electrode was wiped with acetone to serve as a lead. The entire device was encapsulated with 3M polyimide tape.

### **1.4 Characterization and Measurement**

Transmission electron microscopy (TEM, JEM-2100, JEOL) and scanning electron microscope (SEM, EVO MA10, Zeiss) were used to observe the morphologies of the CDs and films. The structural properties of the CDs and films were investigated by Fourier transform infrared spectroscopy (FT-IR, Nicolet IS50, Thermo Scientific), X-ray photoelectron spectroscopy (XPS, Nexsa, Thermo Scientific) and X-ray diffraction (XRD, D8 advance, Bruker). The contact angles of the films were tested by Theta Flex from Biolin. The dielectric constant of the films were determined using a broadband dielectric impedance spectrometer (concept 80, novocontrol). The piezoelectric properties of the devices were explored by an electromechanical platform from the Institute of Nano Science and Technology of the Chinese Academy of Sciences, an oscilloscope (TBS 1202B, Tektronix) and a charge-voltage converter (VK102, Guangdong Weijingyi).

## 2. Supporting figures

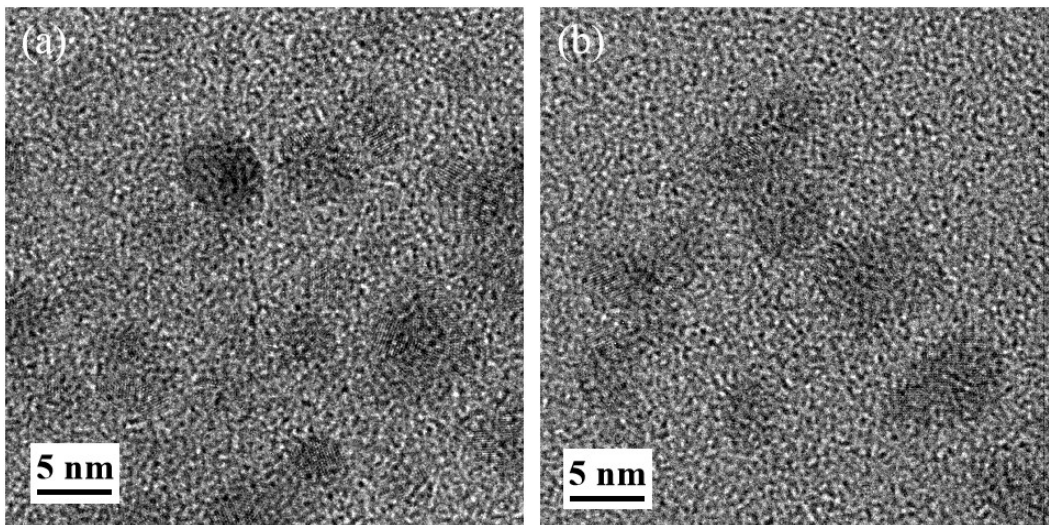

**Fig. S1** TEM images of (b) C1 and (c) C2.

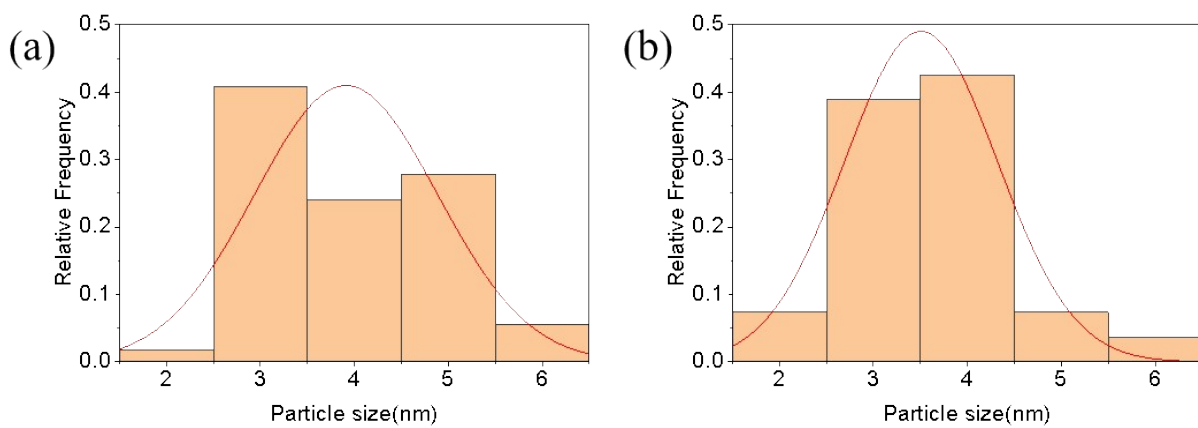

**Fig. S2** Particle size distributions of (a) C1 and (b) C2

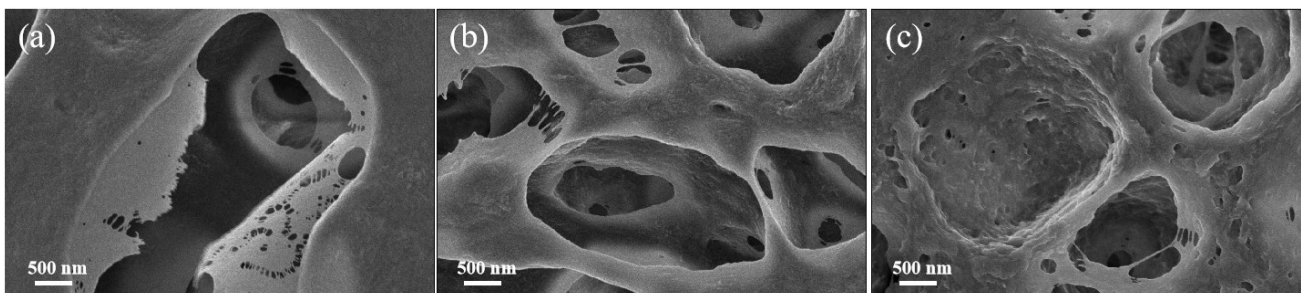

**Fig. S3** SEM images of (a) PC0, (b) PC1 and (c) PC2.

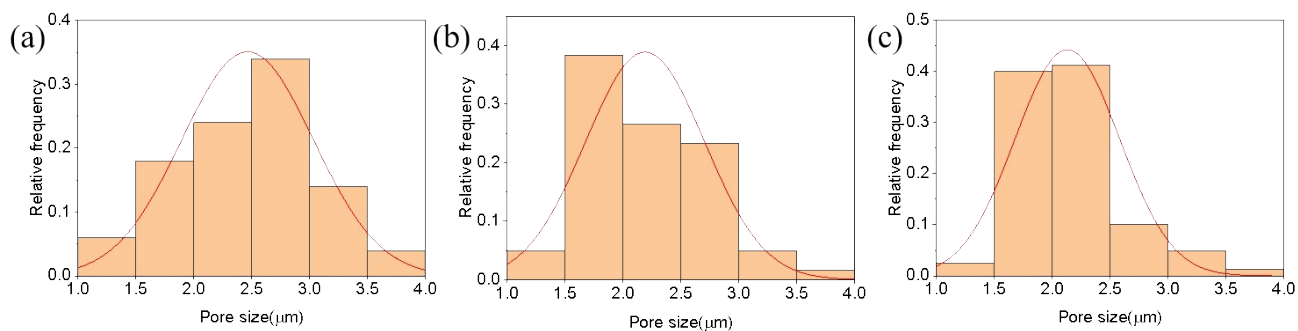

**Fig. S4** Pore size distributions of (a) PC0, (b) PC1 and (c) PC2.

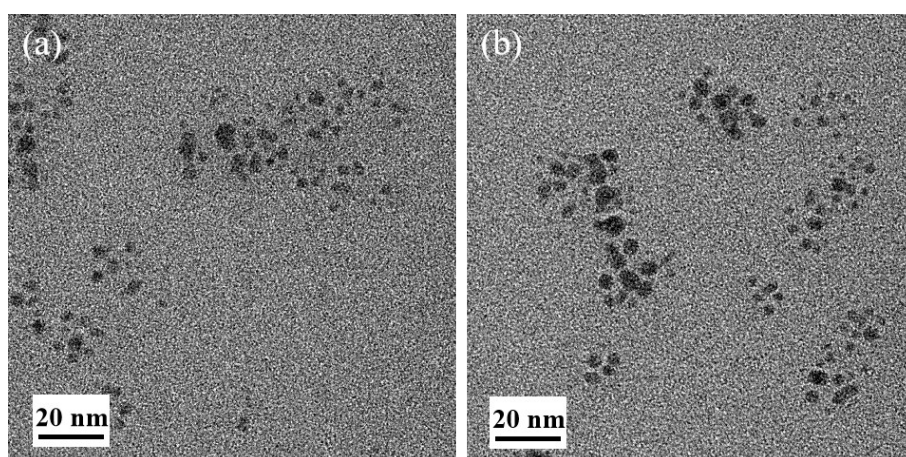

**Fig. S5** TEM images of (a) PC1 and (b) PC2.

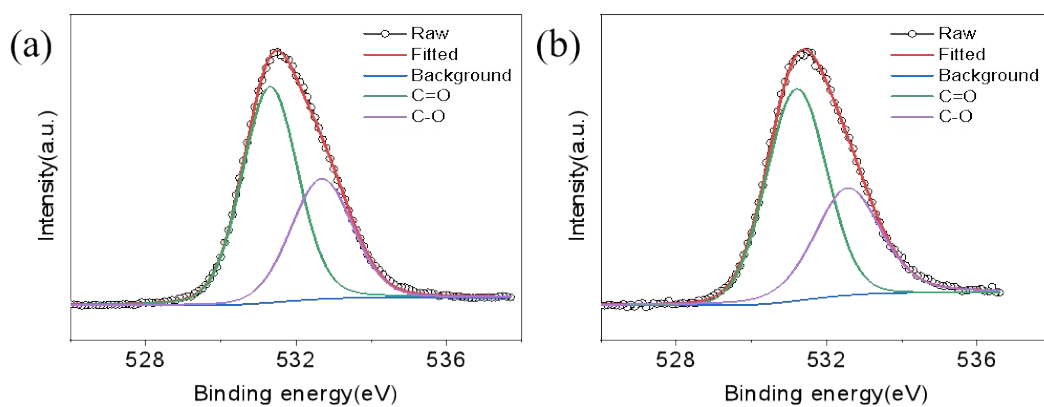

**Fig. S6** XPS high-resolution scans in O 1s of (a) C1 and (b) C2.

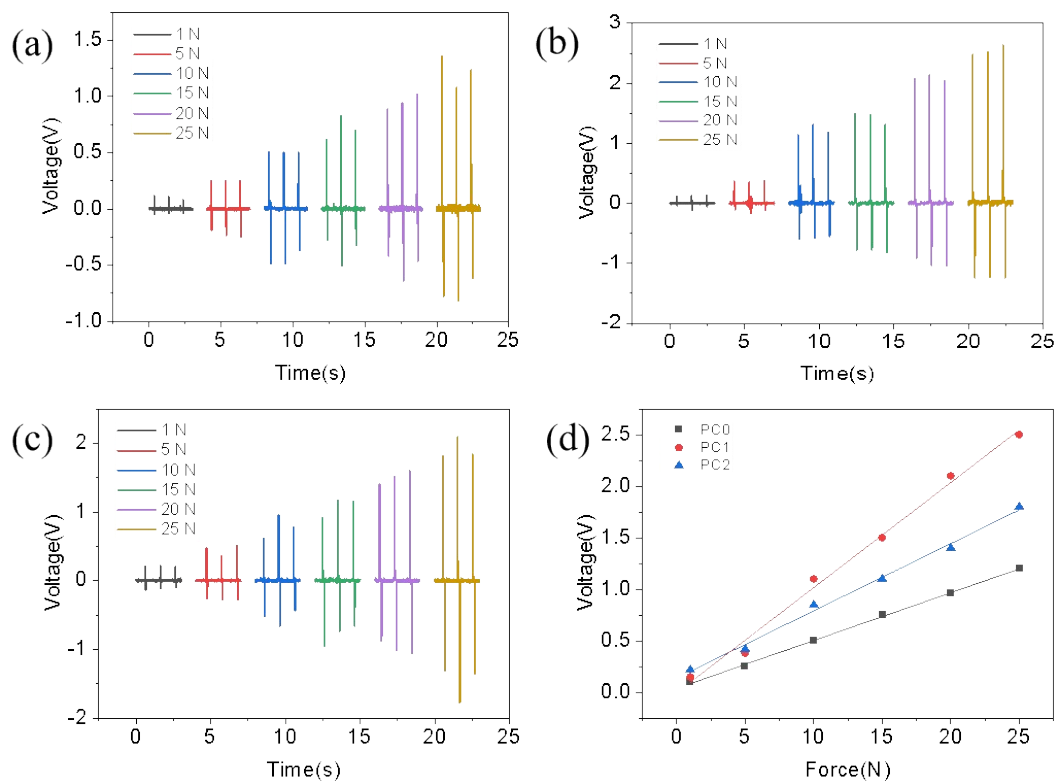

**Figure S7** Real-time output voltages of (a) PC0, (b) PC1 and (c) PC2 under different forces, (d) applied force-voltage curves of the films

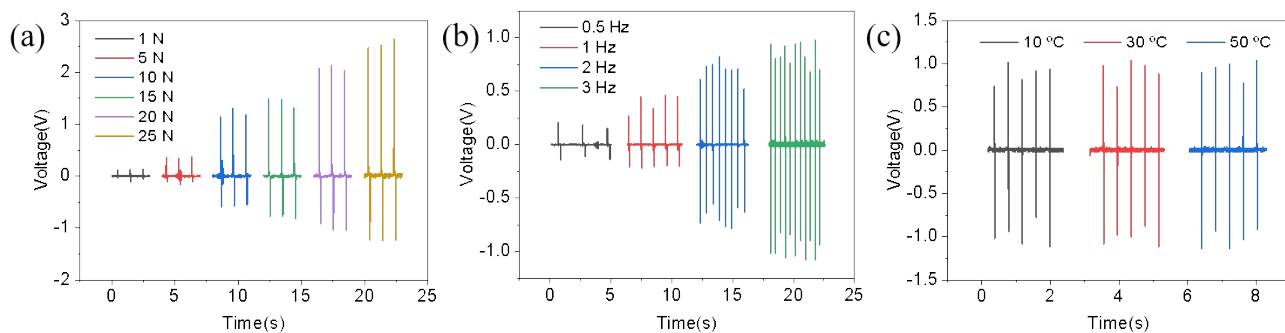

**Fig. S8** Real-time output voltages of PC2 under different (a) forces, (b) frequencies and (c) temperatures

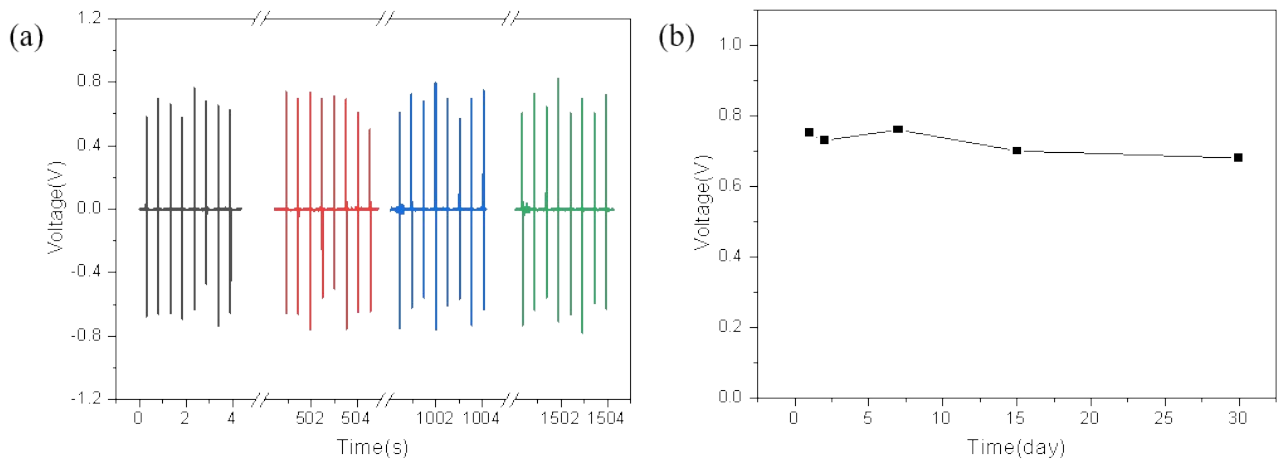

**Fig. S9** (a) Durability and (b) long-term stability of PC2

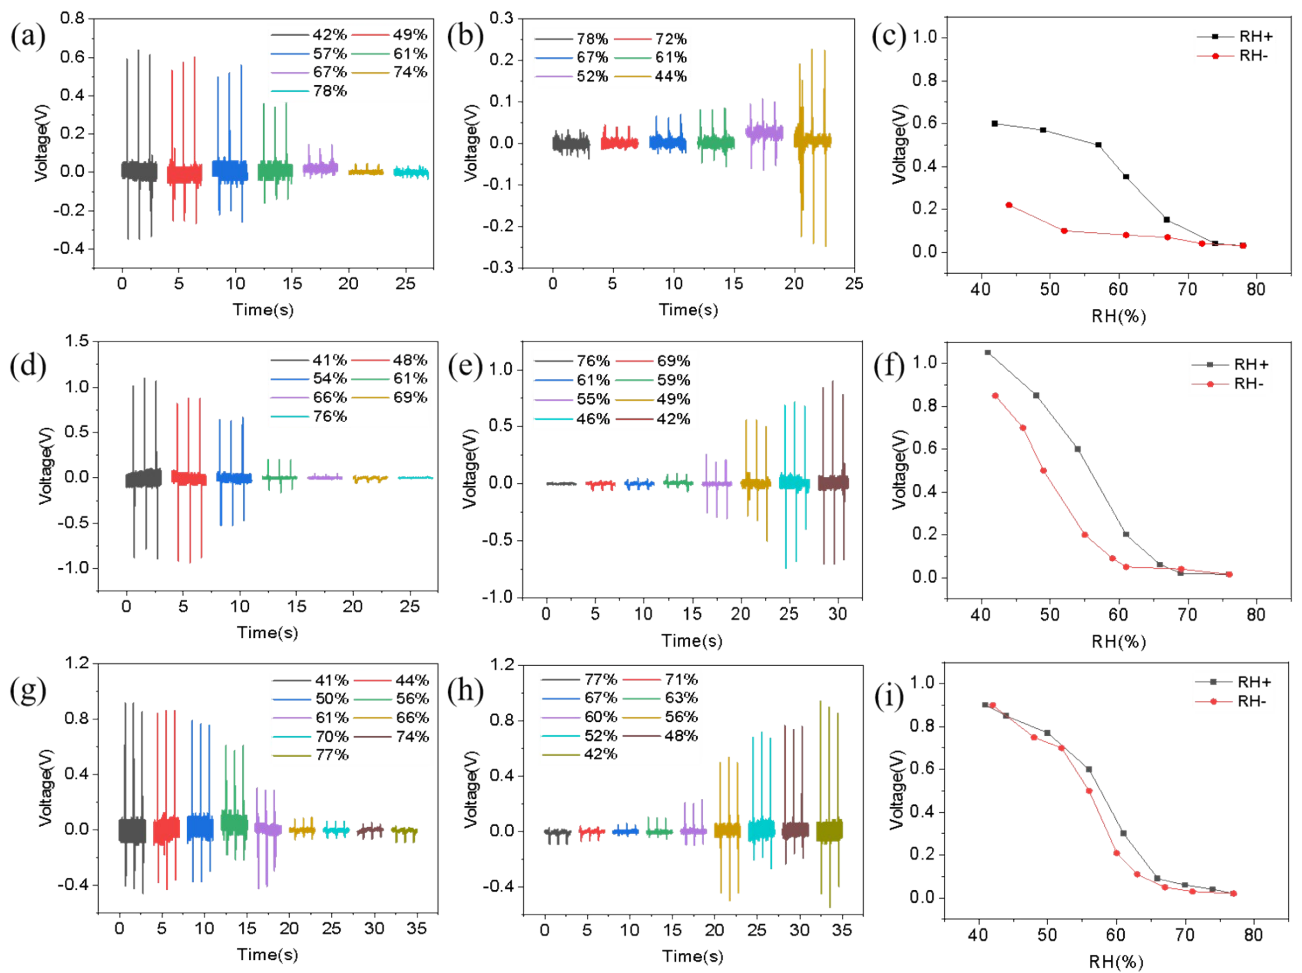

**Figure S10** Real-time output voltages of (a,b,c) PC0, (d,e,f) PC1 and (g,h,i) PC2 under different ambient humidity



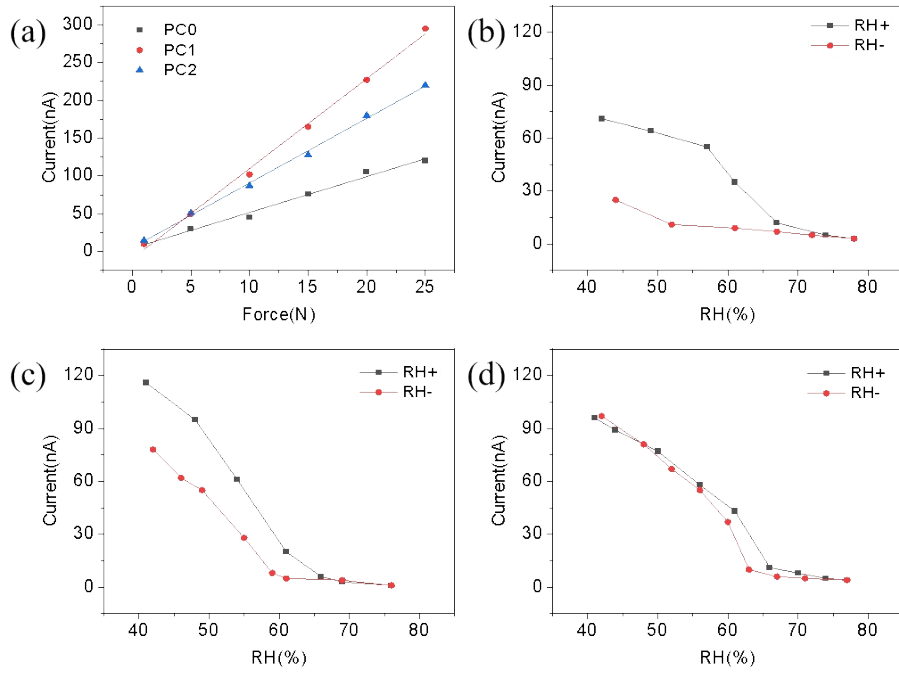

**Fig. S11** (a) Applied force-current curves of the films, RH-current curves of (b) PC0, (c) PC1 and (d) PC2

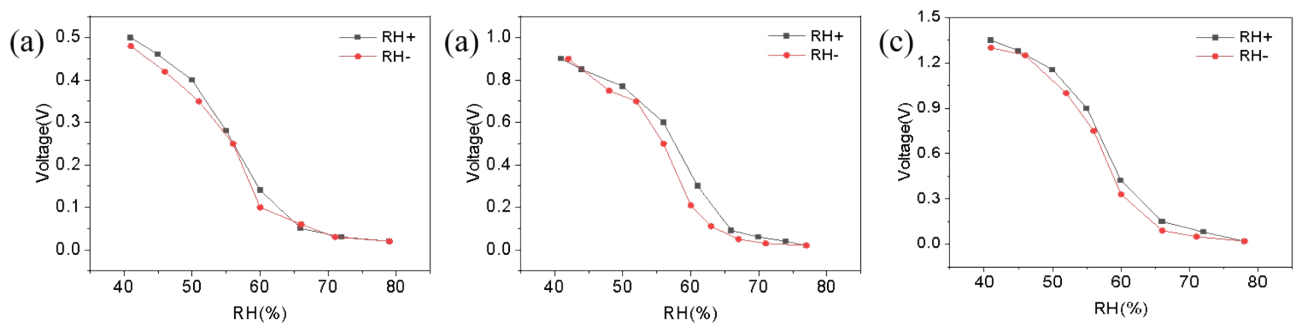

**Fig. S12** RH-voltage curves of PC2 under (e) 5N, (f) 10N and (g) 15N

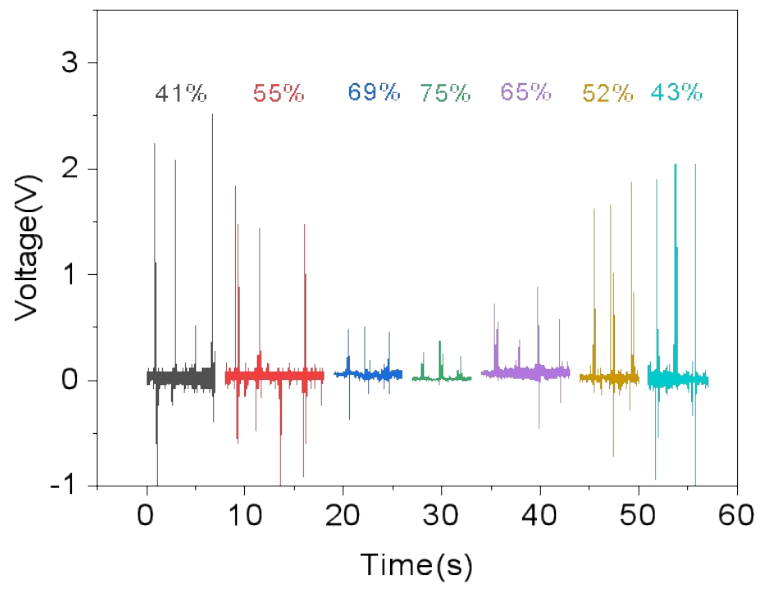

**Fig. S13** Real-time output voltages of the applicable humidity sensor.



### 3. Supporting tables

**Table S1** Element contents of CDs

| Sample | C 1s (284.8 eV) | N 1s (399.8 eV) | O 1s (531.5 eV) |
|--------|-----------------|-----------------|-----------------|
| C1     | 0.5868          | 0.1031          | 0.3101          |
| C2     | 0.6302          | 0.1447          | 0.2251          |

**Table S2** Bond contents of N 1s

| Sample | N-(C) <sub>2</sub> (399.4 eV) | N-(C) <sub>3</sub> (400.0 eV) | N-H (401.0 eV) |
|--------|-------------------------------|-------------------------------|----------------|
| C1     | 0.4555                        | 0.3060                        | 0.2385         |
| C2     | 0.4755                        | 0.4150                        | 0.1095         |

**Table S3** Bond contents of O 1s

| Sample | C=O (531.3 eV) | C-O (532.7 eV) |
|--------|----------------|----------------|
| C1     | 0.6226         | 0.3774         |
| C2     | 0.6174         | 0.3826         |
